# Supplementary material for: Hochu-ekki-to Treatment Improves Reproductive and Immune Modulation in the Stress-Induced Rat Model of Polycystic Ovarian Syndrome
Source: MDPI journal article supplement (doi:10.3390/molecules22060978), 2017-06-13
Supplement: s1 [file s1]

# **Hochu-ekki-to treatment improves reproductive and immune modulation in the stress-induced rat model of polycystic ovarian syndrome**

Short title: Hochu-ekki-to and polycystic ovarian syndrome

Eunkuk Park <sup>1,7</sup>, Chun Whan Choi <sup>2</sup>, Soo Jeong Kim <sup>3,4</sup>, Yong-In Kim <sup>5</sup>, Samkee Sin <sup>6</sup>, Jong-Phil Chu <sup>1</sup> and Jun Young Heo <sup>3,4,8\*</sup>

1 Department of Medical Zoology, College of Medicine, Kyung Hee University, Seoul 130701, Korea; jude0815@hotmail.com; depara@khu.ac.kr

2 **Bio-Center**, Gyeonggido Business and Science Accelerator, Suwon 16229, Korea; cwchoi78@gmail.com

3 Department of Biochemistry, Chungnam National University School of Medicine, Daejeon 301747

4 Department of Medical Science, Chungnam National University School of Medicine, Daejeon 301747, Korea; aaron0506@naver.com

5 International Biological Material Research Center, Korea Research Institute of Bioscience and Biotechnology, Daejeon 34141, Korea; yikim@kribb.re.kr

6 Institute of Korea Food and Drug Resource, Seoul 06622, Korea; samkee3@hanmail.net

7 Department of Medical Genetics, College of Medicine, Ajou University School of Medicine, Suwon 443721 Republic of Korea

8 Brain Research Institute, Chungnam National University School of Medicine, Daejeon 301747, Republic of Korea

Supplementary Figures S1, S2 and Figure Legends

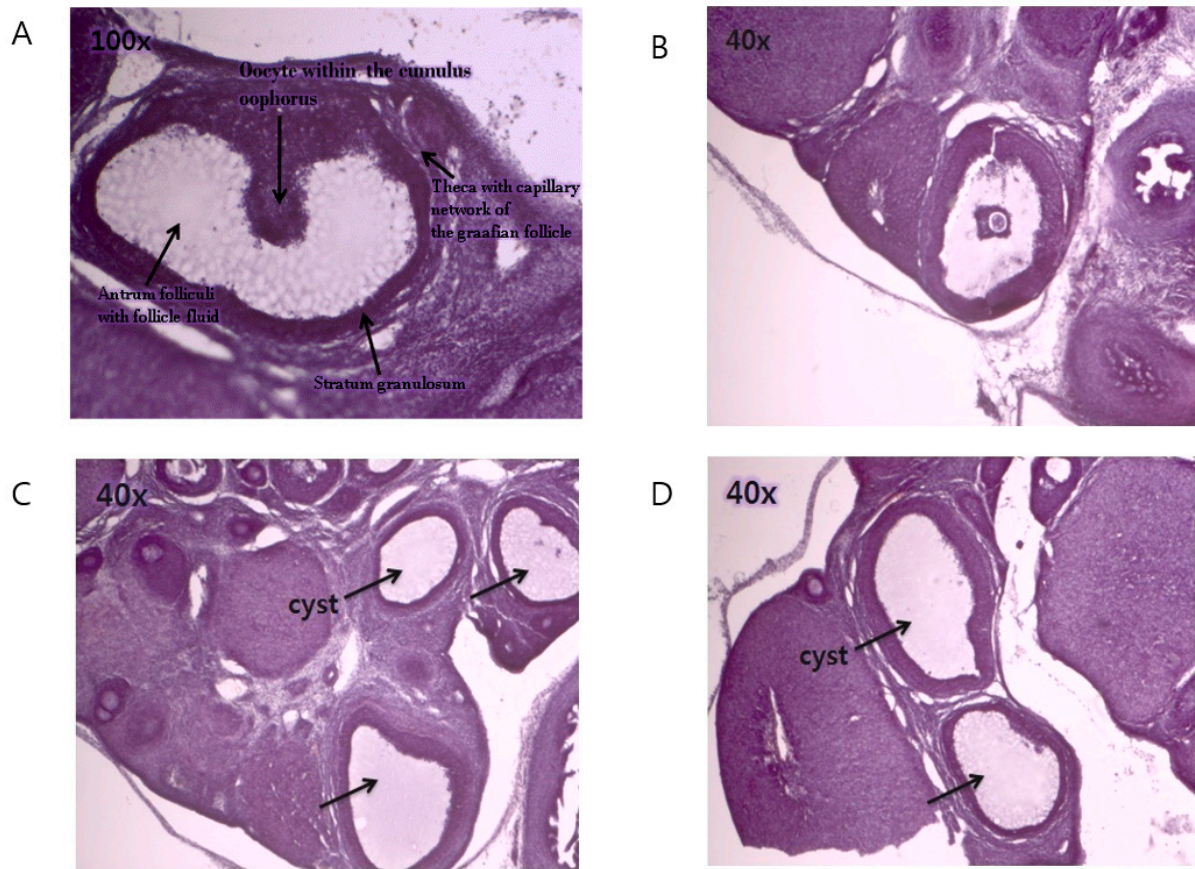

**S1 Figure.** Ovarian morphology was assessed by hematoxylin-eosin staining. (A and B) The morphologies of dominant follicles before ovulation. (C and D) Ovarian morphologies on estrous of rats subjected to ACTH injection and cold stress

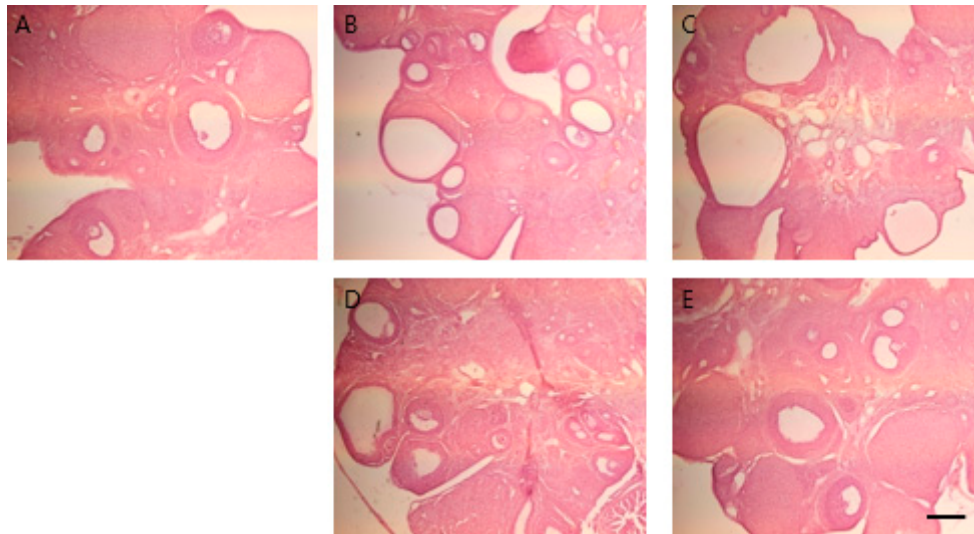

**S2 Figure.** Ovarian morphology was assessed by hematoxylin-eosin staining of ovary sections from rats of the control group (A), ACTH injection group (B), cold-stress group (C), Hochu-ekki-to-treated ACTH injection group (D), and Hochu-ekki-to-treated cold-stress group (E).
